# Supplementary material for: Dual additive strategy for ambient blade-coated MAPbI 3 using a green ionic liquid solvent: towards fully printable perovskite solar cells with carbon electrodes
Source: Royal Society of Chemistry journal article supplement (doi:10.1039/d5nj03030g), 2025-01-01
Supplement: d5nj03030g1.pdf [file d5nj03030g1.pdf]

## Supplementary information

### Dual Additive Strategy for Ambient Blade-Coated MAPbI<sub>3</sub> Using a Green Ionic Liquid Solvent: Towards Fully Printable Perovskite Solar Cells with Carbon Electrodes

Saeed Rajabzade<sup>a</sup>, Karim Abdizadeh<sup>b</sup>, Hossein Taherianfard<sup>c</sup>, Fariba Tajabadi<sup>\*d</sup>, Nima Taghavinia<sup>\*a,c</sup>

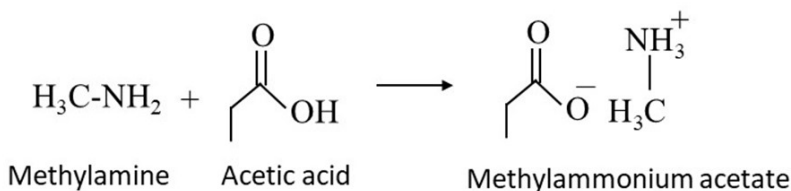

**Fig.S1** Brønsted acid-base reaction of methylamine and acetic acid

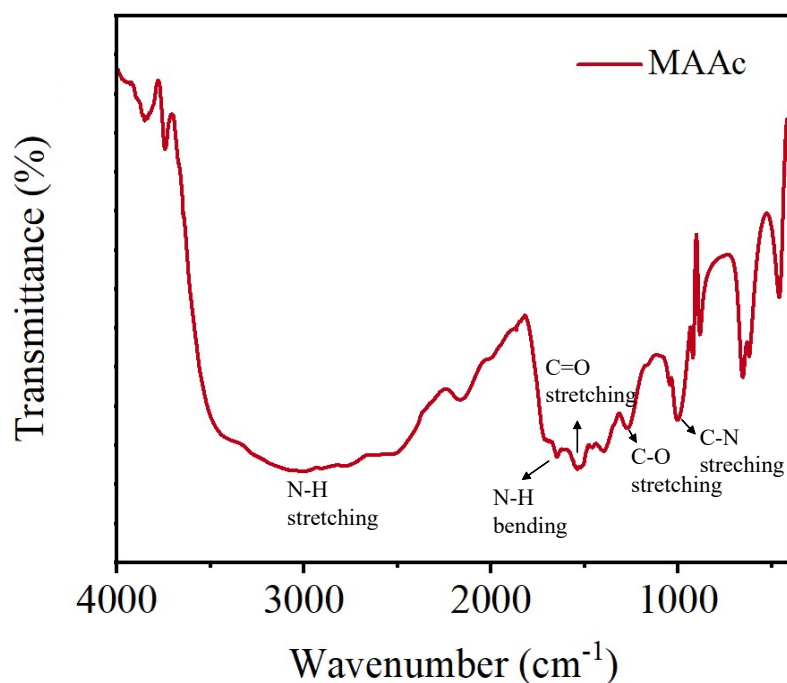

**Fig. S2** FTIR spectra for MAAc. The characteristic signals of -NH and C=O and C-O are confirming the presence of methylammonium acetate

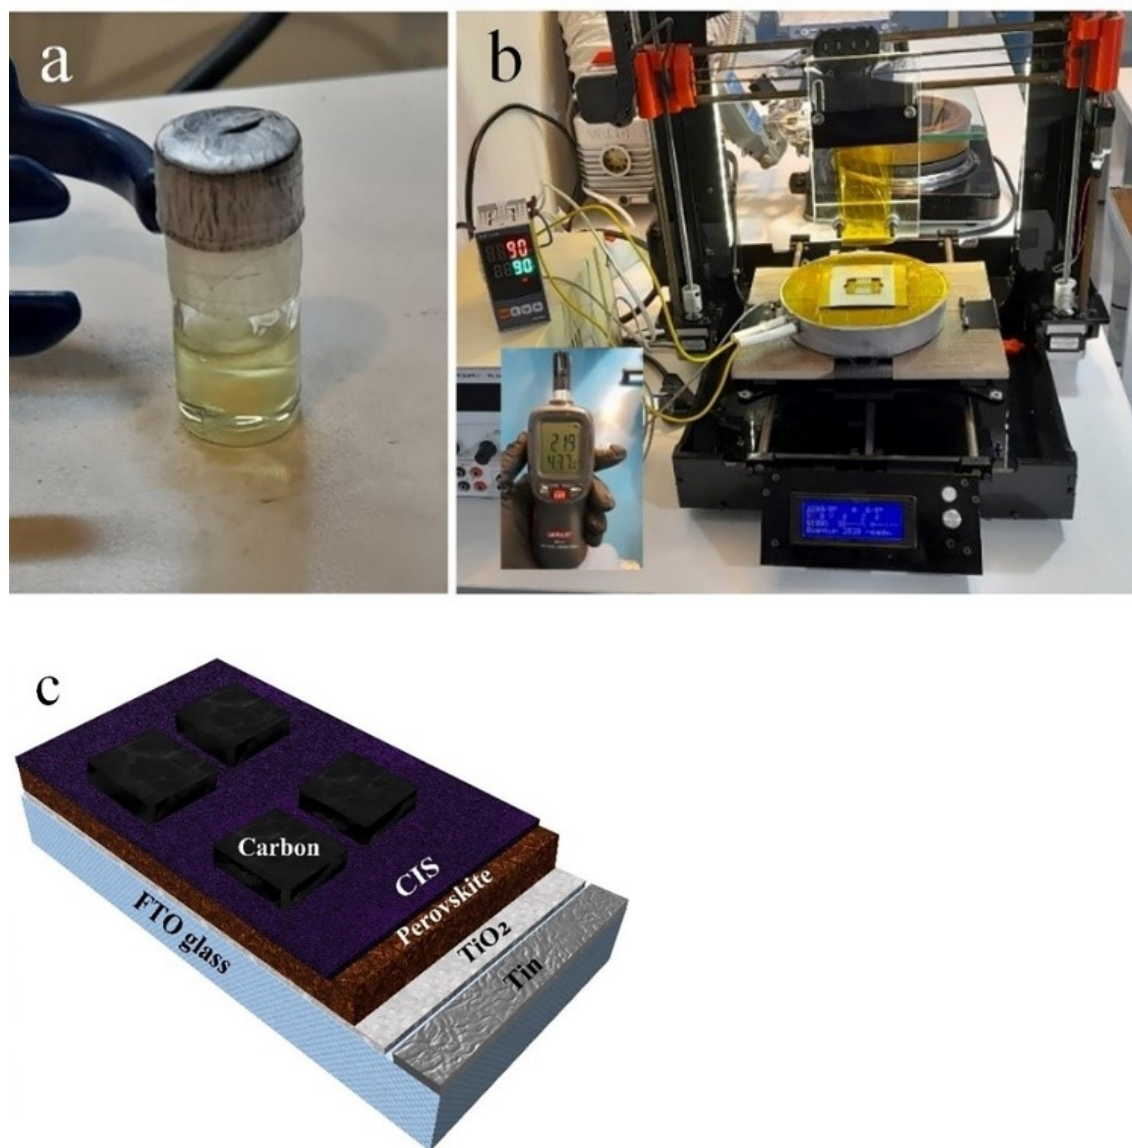

**Fig. S3 a)** Transparency of precursor solutions with dodecylpyridinium chloride (DPCl), showing solubility and homogeneity in MAAc solvent. **b)** The blade coating setup and environmental conditions used during the perovskite film deposition process. **c)** Schematic diagram of the device structure.

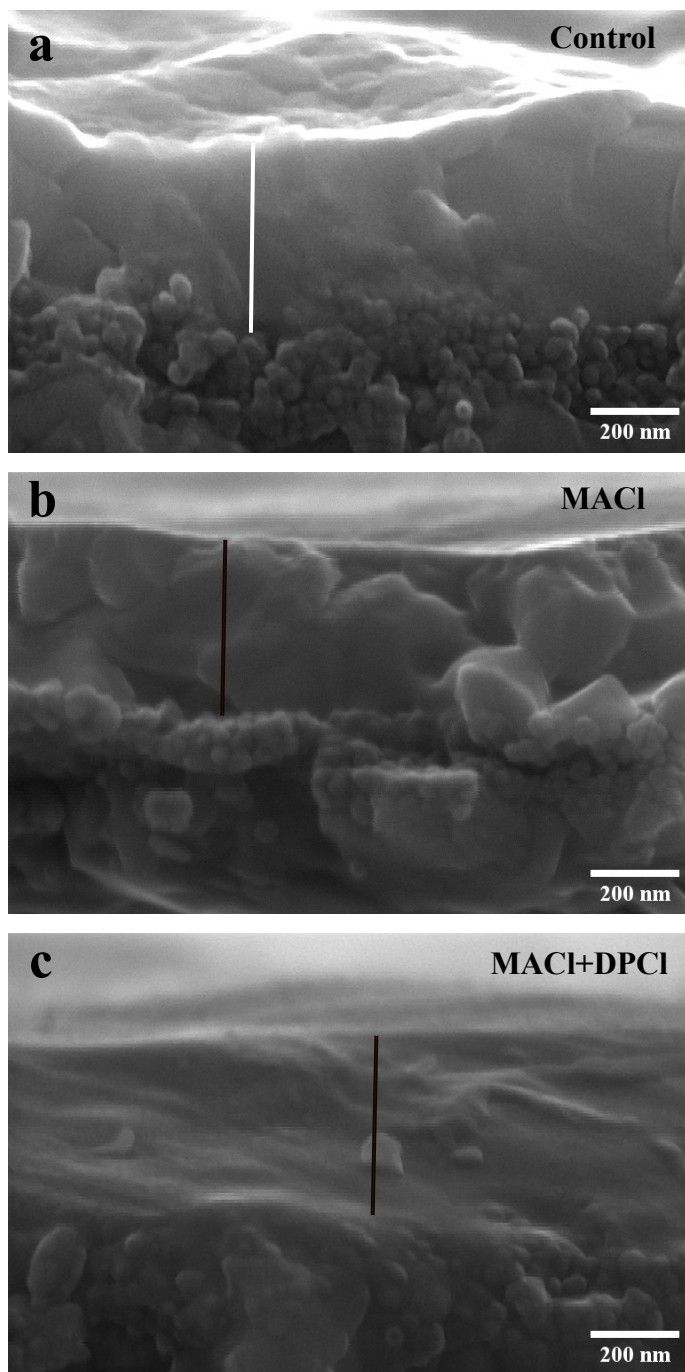

**Fig. S4** Cross-sectional SEM images of **a)** Control perovskite film without chloride-based additives, **b)** with methylammonium chloride (MACl), and **c)** with both MACl and DPCl additives; the scale bar is 200 nm.
